# Supplementary material for: Plasma Proteomic Analysis in Morquio A Disease
Source: MDPI journal article supplement (doi:10.3390/ijms22116165), 2021-06-07
Supplement: s1 [file s1]

**Table S1.** Number of proteins identified per sample and number of proteins identified in all or all but one samples per group. Only proteins with a false discovery rate <1% were selected.

| <b>Patients<br/>and CG</b> | <b>Sample<br/>ID</b> | <b>Proteins Identified<br/>per Sample (<i>n</i>)</b> | <b>Proteins Identified in all or<br/>all but one samples (<i>n</i>)</b> |
|----------------------------|----------------------|------------------------------------------------------|-------------------------------------------------------------------------|
| UG                         | UG 1                 | 268                                                  | 113                                                                     |
|                            | UG 2                 | 215                                                  |                                                                         |
|                            | UG 3                 | 158                                                  |                                                                         |
|                            | UG 4                 | 173                                                  |                                                                         |
|                            | UG 5                 | 187                                                  |                                                                         |
|                            | UG 6                 | 172                                                  |                                                                         |
|                            | UG 7                 | 176                                                  |                                                                         |
|                            | UG 8                 | 204                                                  |                                                                         |
| ERT-a Group                | ERT-a 1              | 257                                                  | 161                                                                     |
|                            | ERT-a 2              | 166                                                  |                                                                         |
|                            | ERT-a 3              | 181                                                  |                                                                         |
|                            | ERT-a 4              | 153                                                  |                                                                         |
|                            | ERT-a 5              | 186                                                  |                                                                         |
| ERT-b Group                | ERT-b 1              | 228                                                  | 130                                                                     |
|                            | ERT-b 2              | 128                                                  |                                                                         |
|                            | ERT-b 3              | 128                                                  |                                                                         |
|                            | ERT-b 4              | 122                                                  |                                                                         |
|                            | ERT-b 5              | 175                                                  |                                                                         |
| CG                         | CG 1                 | 226                                                  | 164                                                                     |
|                            | CG 2                 | 182                                                  |                                                                         |
|                            | CG 3                 | 207                                                  |                                                                         |
|                            | CG 4                 | 211                                                  |                                                                         |
|                            | CG 5                 | 225                                                  |                                                                         |
|                            | CG6                  | 239                                                  |                                                                         |

Abbreviations: CG, control group; MPS IVA, mucopolysaccharidosis type IVA; ERT-a, MPS IVA patients sampled before ERT; ERT-b, MPS IVA patients sampled 24 h after ERT; UG, untreated group.

**Table S2.** List of proteins used for the qualitative study of proteins.

| Code Uniprot | Protein UG                                   |
|--------------|----------------------------------------------|
| P02656       | Apolipoprotein C-III                         |
| Q06033       | Inter-alpha-trypsin inhibitor heavy chain H3 |
| P00918       | Carbonic anhydrase 2                         |
| P02675       | Fibrinogen beta chain                        |
| P01594       | Immunoglobulin kappa variable 1-33           |
| P01042       | Kininogen-1                                  |
| P05155       | lasma protease C1 inhibitor                  |
| P01019       | Angiotensinogen                              |
| P19823       | Inter-alpha-trypsin inhibitor heavy chain H2 |
| P01859       | Immunoglobulin heavy constant gamma 2        |
| P01860       | Immunoglobulin heavy constant gamma 3        |
| P04264       | Keratin, type II cytoskeletal 1              |
| P02774       | Vitamin D-binding protein                    |
| P00450       | Ceruloplasmin                                |
| P80748       | Immunoglobulin lambda variable 3-21          |
| P01008       | Antithrombin-III                             |
| P02751       | Fibronectin                                  |
| P02647       | Apolipoprotein A-I                           |
| P06681       | Complement C2                                |
| P06310       | Immunoglobulin kappa variable 2-30           |
| P06276       | Cholinesterase                               |
| P32119       | Peroxiredoxin-2                              |
| A0A0B4J1V0   | Immunoglobulin heavy variable 3-15           |
| P02649       | Apolipoprotein E                             |
| Q96KN2       | Beta-Ala-His dipeptidase                     |
| P01876       | Immunoglobulin heavy constant alpha 1        |
| P02745       | Complement C1q subcomponent subunit A        |
| A0A0A0MS15   | Immunoglobulin heavy variable 3-49           |
| P01023       | Alpha-2-macroglobulin                        |
| P02671       | Fibrinogen alpha chain                       |
| A0A0B4J1U3   | Immunoglobulin lambda variable 1-36          |
| P07225       | Vitamin K-dependent protein S                |
| P63261       | Actin, cytoplasmic 2                         |
| P01871       | Immunoglobulin heavy constant mu             |
| P43652       | Afamin                                       |
| P05452       | Tetranectin                                  |
| P01780       | Immunoglobulin heavy variable 3-7            |
| P29622       | Kallistatin                                  |
| P51884       | Lumican                                      |
| P05543       | Thyroxine-binding globulin                   |
| P02766       | Transthyretin                                |
| Q15848       | Adiponectin                                  |
| A0A0C4DH31   | Immunoglobulin heavy variable 1-18           |
| P08603       | Complement factor H                          |

|            |                                              |
|------------|----------------------------------------------|
| P01011     | Alpha-1-antichymotrypsin                     |
| P00751     | Complement factor B                          |
| P0C0L4     | Complement C4-A                              |
| P04180     | Phosphatidylcholine-sterol acyltransferase   |
| P36955     | Pigment epithelium-derived factor            |
| P01602     | Immunoglobulin kappa variable 1-5            |
| A0A0B4J1U7 | Immunoglobulin heavy variable 6-1            |
| P43251     | Biotinidase                                  |
| O14791     | Apolipoprotein L1                            |
| P0C0L5     | Complement C4-B                              |
| P01877     | Immunoglobulin heavy constant alpha 2        |
| P06727     | Apolipoprotein A-IV                          |
| P02042     | Hemoglobin subunit delta                     |
| P02750     | Leucine-rich alpha-2-glycoprotein            |
| P01834     | Immunoglobulin kappa constant                |
| Q08380     | Galectin-3-binding protein                   |
| P02652     | Apolipoprotein A-II                          |
| P02765     | Alpha-2-HS-glycoprotein                      |
| Q9UK55     | Protein Z-dependent protease inhibitor       |
| P01024     | Complement C3                                |
| A0A0B4J1X5 | Immunoglobulin heavy variable 3-74           |
| P05090     | Apolipoprotein D                             |
| O95445     | Apolipoprotein M                             |
| P01615     | Immunoglobulin kappa variable 2D-28          |
| P13645     | Keratin, type I cytoskeletal 10              |
| P08185     | Corticosteroid-binding globulin              |
| P01701     | Immunoglobulin lambda variable 1-51          |
| P01857     | Immunoglobulin heavy constant gamma 1        |
| P27169     | Serum paraoxonase/arylesterase 1             |
| A0A0C4DH38 | Immunoglobulin heavy variable 5-51           |
| P05154     | Plasma serine protease inhibitor             |
| P04217     | Alpha-1B-glycoprotein                        |
| P04004     | Vitronectin                                  |
| B9A064     | Immunoglobulin lambda-like polypeptide 5     |
| P01611     | Immunoglobulin kappa variable 1D-12          |
| P19827     | Inter-alpha-trypsin inhibitor heavy chain H1 |
| P02747     | Complement C1q subcomponent subunit C        |
| P01619     | Immunoglobulin kappa variable 3-20           |
| P06312     | Immunoglobulin kappa variable 4-1            |
| P04211     | Immunoglobulin lambda variable 7-43          |
| P68871     | Hemoglobin subunit beta                      |
| P01706     | Immunoglobulin lambda variable 2-11          |
| P02743     | Serum amyloid P-component                    |
| P02790     | Hemopexin                                    |
| A0A0C4DH24 | Immunoglobulin kappa variable 6-21           |
| P01700     | Immunoglobulin lambda variable 1-47          |

|            |                                                                        |
|------------|------------------------------------------------------------------------|
| Q96PD5     | N-acetylmuramoyl-L-alanine amidase                                     |
| P00738     | Haptoglobin                                                            |
| P01591     | Immunoglobulin J chain                                                 |
| P02654     | Apolipoprotein C-I                                                     |
| P01601     | Immunoglobulin kappa variable 1D-16                                    |
| P02655     | Apolipoprotein C-II                                                    |
| P06396     | Gelsolin                                                               |
| P25311     | Zinc-alpha-2-glycoprotein                                              |
| P02787     | Serotransferrin                                                        |
| P06702     | Protein S100-A9                                                        |
| P35858     | Insulin-like growth factor-binding protein complex acid labile subunit |
| P10909     | Clusterin                                                              |
| P01721     | Immunoglobulin lambda variable 6-57                                    |
| P08697     | Alpha-2-antiplasmin                                                    |
| P04433     | Immunoglobulin kappa variable 3-11                                     |
| P0DP03     | Immunoglobulin heavy variable 3-30-5                                   |
| P22792     | Carboxypeptidase N subunit 2                                           |
| P02768     | Albumin                                                                |
| Q03591     | Complement factor H-related protein 1                                  |
| A0A0B4J1V2 | Immunoglobulin heavy variable 2-26                                     |
| Q14624     | Inter-alpha-trypsin inhibitor heavy chain H4                           |
| A0A0C4DH68 | Immunoglobulin kappa variable 2-24                                     |
| A0A0B4J1Y9 | Immunoglobulin heavy variable 3-72                                     |
| P01009     | Alpha-1-antitrypsin                                                    |
| P02679     | Fibrinogen gamma chain                                                 |
| P02753     | Retinol-binding protein 4                                              |
| P02746     | Complement C1q subcomponent subunit B                                  |
| P02763     | Alpha-1-acid glycoprotein 1                                            |
| P05156     | Complement factor I                                                    |
| P01861     | Immunoglobulin heavy constant gamma 4                                  |
| P35542     | Serum amyloid A-4 protein                                              |
| P49908     | Selenoprotein P                                                        |
| P01624     | Immunoglobulin kappa variable 3-15                                     |
| P01031     | Complement C5                                                          |
| P04430     | Immunoglobulin kappa variable 1-16                                     |
| P02749     | Beta-2-glycoprotein 1                                                  |
| A0A075B6I0 | Immunoglobulin lambda variable 8-61                                    |
| Q96IY4     | Carboxypeptidase B2                                                    |
| P19652     | Alpha-1-acid glycoprotein 2                                            |
| P00915     | Carbonic anhydrase 1                                                   |
| P02760     | Protein AMBP                                                           |
| P69905     | Hemoglobin subunit alpha                                               |
| P05546     | Heparin cofactor 2                                                     |
| P04114     | Apolipoprotein B-100                                                   |
| P35527     | Keratin, type I cytoskeletal 9                                         |
| P00739     | Haptoglobin-related protein                                            |

|            |                                          |
|------------|------------------------------------------|
| P00734     | Prothrombin                              |
| P04196     | Histidine-rich glycoprotein              |
| P01743     | Immunoglobulin heavy variable 1-46       |
| A0A0A0MT36 | Immunoglobulin kappa variable 6D-21      |
| A0A0J9YX35 | Immunoglobulin heavy variable 3-64D      |
| A0A0C4DH34 | Immunoglobulin heavy variable 4-28       |
| P00488     | Coagulation factor XIII A chain          |
| A0A075B6J9 | Immunoglobulin lambda variable 2-18      |
| P18428     | Lipopolysaccharide-binding protein       |
| P04432     | Immunoglobulin kappa variable 1D-39      |
| A0A0C4DH25 | Immunoglobulin kappa variable 3D-20      |
| O00391     | Sulfhydryl oxidase 1                     |
| P01599     | Immunoglobulin kappa variable 1-17       |
| P13796     | Plastin-2                                |
| O43866     | CD5 antigen-like                         |
| P22352     | Glutathione peroxidase 3                 |
| O75882     | Attractin                                |
| P01714     | Immunoglobulin lambda variable 3-19      |
| P01709     | Immunoglobulin lambda variable 2-8       |
| P15814     | Immunoglobulin lambda-like polypeptide 1 |
| P01717     | Immunoglobulin lambda variable 3-25      |
| A0A0B4J1Y8 | Immunoglobulin lambda variable 9-49      |
| P00742     | Coagulation factor X                     |
| P55058     | Phospholipid transfer protein            |
| P05109     | Protein S100-A8                          |
| P04278     | Sex hormone-binding globulin             |
| P15169     | Carboxypeptidase N catalytic chain       |
| P11597     | Cholesteryl ester transfer protein       |

|              |       |
|--------------|-------|
| Code Uniprot | ERT-a |
|--------------|-------|

|        |                                              |
|--------|----------------------------------------------|
| P02656 | Apolipoprotein C-III                         |
| Q06033 | Inter-alpha-trypsin inhibitor heavy chain H3 |
| P02675 | Fibrinogen beta chain                        |
| P01594 | Immunoglobulin kappa variable 1-33           |
| P01042 | Kininogen-1                                  |
| P05155 | Plasma protease C1 inhibitor                 |
| P01019 | Angiotensinogen                              |
| P19823 | Inter-alpha-trypsin inhibitor heavy chain H2 |
| P01859 | Immunoglobulin heavy constant gamma 2        |
| P04264 | Keratin, type II cytoskeletal 1              |
| P02774 | Vitamin D-binding protein                    |
| P00450 | Ceruloplasmin                                |
| P01008 | Antithrombin-III                             |
| P02647 | Apolipoprotein A-I                           |
| P06681 | Complement C2                                |
| P06310 | Immunoglobulin kappa variable 2-30           |
| P06276 | Cholinesterase                               |

|            |                                              |
|------------|----------------------------------------------|
| P02649     | Apolipoprotein E                             |
| P01876     | Immunoglobulin heavy constant alpha 1        |
| P01023     | Alpha-2-macroglobulin                        |
| P02671     | Fibrinogen alpha chain                       |
| P07225     | Vitamin K-dependent protein S                |
| P01871     | Immunoglobulin heavy constant mu             |
| P63261     | Actin, cytoplasmic 2                         |
| P43652     | Afamin                                       |
| P35908     | Keratin, type II cytoskeletal 2 epidermal    |
| P29622     | Kallistatin                                  |
| P51884     | Lumican                                      |
| P05543     | Thyroxine-binding globulin                   |
| P02766     | Transthyretin                                |
| P08603     | Complement factor H                          |
| P01011     | Alpha-1-antichymotrypsin                     |
| P00751     | Complement factor B                          |
| P12259     | Coagulation factor V                         |
| P0C0L4     | Complement C4-A                              |
| P36955     | Pigment epithelium-derived factor            |
| P43251     | Biotinidase                                  |
| Q9NZP8     | Complement C1r subcomponent-like protein     |
| O14791     | Apolipoprotein L1                            |
| P06727     | Apolipoprotein A-IV                          |
| P02042     | Hemoglobin subunit delta                     |
| P02750     | Leucine-rich alpha-2-glycoprotein            |
| A0A075B6H9 | Immunoglobulin lambda variable 4-69          |
| P01834     | Immunoglobulin kappa constant                |
| Q08380     | Galectin-3-binding protein                   |
| P02652     | Apolipoprotein A-II                          |
| P02765     | Alpha-2-HS-glycoprotein                      |
| Q9UK55     | Protein Z-dependent protease inhibitor       |
| P01024     | Complement C3                                |
| P05090     | Apolipoprotein D                             |
| O95445     | Apolipoprotein M                             |
| P01615     | Immunoglobulin kappa variable 2D-28          |
| P13645     | Keratin, type I cytoskeletal 10              |
| P08185     | Corticosteroid-binding globulin              |
| P01857     | Immunoglobulin heavy constant gamma 1        |
| P27169     | Serum paraoxonase/arylesterase 1             |
| P15169     | Carboxypeptidase N catalytic chain           |
| P05154     | Plasma serine protease inhibitor             |
| P04217     | Alpha-1B-glycoprotein                        |
| B9A064     | Immunoglobulin lambda-like polypeptide 5     |
| P11597     | Cholesteryl ester transfer protein           |
| P19827     | Inter-alpha-trypsin inhibitor heavy chain H1 |
| A0A0B4J1Y8 | Immunoglobulin lambda variable 9-49          |

|            |                                                                        |
|------------|------------------------------------------------------------------------|
| P01619     | Immunoglobulin kappa variable 3-20                                     |
| P68871     | Hemoglobin subunit beta                                                |
| P02743     | Serum amyloid P-component                                              |
| P02790     | Hemopexin                                                              |
| P01700     | Immunoglobulin lambda variable 1-47                                    |
| Q96PD5     | N-acetylmuramoyl-L-alanine amidase                                     |
| P00738     | Haptoglobin                                                            |
| P01591     | Immunoglobulin J chain                                                 |
| P02654     | Apolipoprotein C-I                                                     |
| P25311     | Zinc-alpha-2-glycoprotein                                              |
| P06396     | Gelsolin                                                               |
| P02787     | Serotransferrin                                                        |
| P35858     | Insulin-like growth factor-binding protein complex acid labile subunit |
| P10909     | Clusterin                                                              |
| P08697     | Alpha-2-antiplasmin                                                    |
| P55058     | Phospholipid transfer protein                                          |
| P22792     | Carboxypeptidase N subunit 2                                           |
| P02768     | Albumin                                                                |
| Q14624     | Inter-alpha-trypsin inhibitor heavy chain H4                           |
| P01009     | Alpha-1-antitrypsin                                                    |
| P02679     | Fibrinogen gamma chain                                                 |
| P02753     | Retinol-binding protein 4                                              |
| P0DOY3     | Immunoglobulin lambda constant 3                                       |
| P35542     | Serum amyloid A-4 protein                                              |
| P01031     | Complement C5                                                          |
| P02749     | Beta-2-glycoprotein 1                                                  |
| A0A075B6I0 | Immunoglobulin lambda variable 8-61                                    |
| P19652     | Alpha-1-acid glycoprotein 2                                            |
| P00915     | Carbonic anhydrase 1                                                   |
| P02760     | Protein AMBP                                                           |
| P69905     | Hemoglobin subunit alpha                                               |
| P05546     | Heparin cofactor 2                                                     |
| P04114     | Apolipoprotein B-100                                                   |
| P04196     | Histidine-rich glycoprotein                                            |
| P04278     | Sex hormone-binding globulin                                           |
| O00391     | Sulfhydryl oxidase 1                                                   |
| A0A0B4J1U7 | Immunoglobulin heavy variable 6-1                                      |
| A0M8Q6     | Immunoglobulin lambda constant 7                                       |
| A0A0C4DH68 | Immunoglobulin kappa variable 2-24                                     |
| P35527     | Keratin, type I cytoskeletal 9                                         |
| P01880     | Immunoglobulin heavy constant delta                                    |
| P04040     | Catalase                                                               |
| P01714     | Immunoglobulin lambda variable 3-19                                    |
| P05452     | Tetranectin                                                            |
| P04180     | Phosphatidylcholine-sterol acyltransferase                             |
| P01602     | Immunoglobulin kappa variable 1-5                                      |

|            |                                                      |
|------------|------------------------------------------------------|
| P0C0L5     | Complement C4-B                                      |
| P01721     | Immunoglobulin lambda variable 6-57                  |
| P02763     | Alpha-1-acid glycoprotein 1                          |
| P01861     | Immunoglobulin heavy constant gamma 4                |
| Q96IY4     | Carboxypeptidase B2                                  |
| P00734     | Prothrombin                                          |
| O75882     | Attractin                                            |
| P00488     | Coagulation factor XIII A chain                      |
| P02747     | Complement C1q subcomponent subunit C                |
| P04211     | Immunoglobulin lambda variable 7-43                  |
| P02746     | Complement C1q subcomponent subunit B                |
| P32119     | Peroxiredoxin-2                                      |
| A0A0B4J1V0 | Immunoglobulin heavy variable 3-15                   |
| Q15848     | Adiponectin                                          |
| P02655     | Apolipoprotein C-II                                  |
| P02751     | Fibronectin                                          |
| P04003     | C4b-binding protein alpha chain                      |
| P0DP08     | Immunoglobulin heavy variable 4-38-2                 |
| A0A0C4DH34 | Immunoglobulin heavy variable 4-28                   |
| P80108     | Phosphatidylinositol-glycan-specific phospholipase D |

|              |       |
|--------------|-------|
| Code Uniprot | ERT-b |
|--------------|-------|

|            |                                              |
|------------|----------------------------------------------|
| Q06033     | Inter-alpha-trypsin inhibitor heavy chain H3 |
| P02675     | Fibrinogen beta chain                        |
| P01594     | Immunoglobulin kappa variable 1-33           |
| P01042     | Kininogen-1                                  |
| P05155     | Plasma protease C1 inhibitor                 |
| P01019     | Angiotensinogen                              |
| P19823     | Inter-alpha-trypsin inhibitor heavy chain H2 |
| P01859     | Immunoglobulin heavy constant gamma 2        |
| P04264     | Keratin, type II cytoskeletal 1              |
| P00450     | Ceruloplasmin                                |
| P01008     | Antithrombin-III                             |
| P02647     | Apolipoprotein A-I                           |
| P06681     | Complement C2                                |
| P06310     | Immunoglobulin kappa variable 2-30           |
| P06276     | Cholinesterase                               |
| P02649     | Apolipoprotein E                             |
| P01876     | Immunoglobulin heavy constant alpha 1        |
| P01023     | Alpha-2-macroglobulin                        |
| P02671     | Fibrinogen alpha chain                       |
| A0A0C4DH25 | Immunoglobulin kappa variable 3D-20          |
| P07225     | Vitamin K-dependent protein S                |
| P01871     | Immunoglobulin heavy constant mu             |
| P35908     | Keratin, type II cytoskeletal 2 epidermal    |
| P29622     | Kallistatin                                  |
| P51884     | Lumican                                      |



|            |                                                                        |
|------------|------------------------------------------------------------------------|
| P05543     | Thyroxine-binding globulin                                             |
| P02766     | Transthyretin                                                          |
| P01011     | Alpha-1-antichymotrypsin                                               |
| P00751     | Complement factor B                                                    |
| P0C0L4     | Complement C4-A                                                        |
| P36955     | Pigment epithelium-derived factor                                      |
| P04003     | C4b-binding protein alpha chain                                        |
| Q9NZP8     | Complement C1r subcomponent-like protein                               |
| O14791     | Apolipoprotein L1                                                      |
| P06727     | Apolipoprotein A-IV                                                    |
| P02750     | Leucine-rich alpha-2-glycoprotein                                      |
| P01834     | Immunoglobulin kappa constant                                          |
| Q08380     | Galectin-3-binding protein                                             |
| P02652     | Apolipoprotein A-II                                                    |
| P02765     | Alpha-2-HS-glycoprotein                                                |
| Q9UK55     | Protein Z-dependent protease inhibitor                                 |
| P01024     | Complement C3                                                          |
| P05090     | Apolipoprotein D                                                       |
| P0DP08     | Immunoglobulin heavy variable 4-38-2                                   |
| P01615     | Immunoglobulin kappa variable 2D-28                                    |
| P13645     | Keratin, type I cytoskeletal 10                                        |
| P08185     | Corticosteroid-binding globulin                                        |
| P01857     | Immunoglobulin heavy constant gamma 1                                  |
| P27169     | Serum paraoxonase/arylesterase 1                                       |
| P15169     | Carboxypeptidase N catalytic chain                                     |
| P05154     | Plasma serine protease inhibitor                                       |
| P04217     | Alpha-1B-glycoprotein                                                  |
| B9A064     | Immunoglobulin lambda-like polypeptide 5                               |
| P11597     | Cholesteryl ester transfer protein                                     |
| P19827     | Inter-alpha-trypsin inhibitor heavy chain H1                           |
| A0A0B4J1Y8 | Immunoglobulin lambda variable 9-49                                    |
| P68871     | Hemoglobin subunit beta                                                |
| P02790     | Hemopexin                                                              |
| P01700     | Immunoglobulin lambda variable 1-47                                    |
| Q96PD5     | N-acetylmuramoyl-L-alanine amidase                                     |
| P00738     | Haptoglobin                                                            |
| P01591     | Immunoglobulin J chain                                                 |
| P25311     | Zinc-alpha-2-glycoprotein                                              |
| P06396     | Gelsolin                                                               |
| P02787     | Serotransferrin                                                        |
| P35858     | Insulin-like growth factor-binding protein complex acid labile subunit |
| P10909     | Clusterin                                                              |
| P08697     | Alpha-2-antiplasmin                                                    |
| P55058     | Phospholipid transfer protein                                          |
| P22792     | Carboxypeptidase N subunit 2                                           |
| P02768     | Albumin                                                                |

|              |                                              |
|--------------|----------------------------------------------|
| Q14624       | Inter-alpha-trypsin inhibitor heavy chain H4 |
| P01009       | Alpha-1-antitrypsin                          |
| P02679       | Fibrinogen gamma chain                       |
| P02753       | Retinol-binding protein 4                    |
| P0DOY3       | Immunoglobulin lambda constant 3             |
| P01861       | Immunoglobulin heavy constant gamma 4        |
| P01031       | Complement C5                                |
| P19652       | Alpha-1-acid glycoprotein 2                  |
| P02760       | Protein AMBP                                 |
| P69905       | Hemoglobin subunit alpha                     |
| P05546       | Heparin cofactor 2                           |
| P04114       | Apolipoprotein B-100                         |
| P35527       | Keratin, type I cytoskeletal 9               |
| P00734       | Prothrombin                                  |
| P04196       | Histidine-rich glycoprotein                  |
| P43652       | Afamin                                       |
| P08603       | Complement factor H                          |
| P02751       | Fibronectin                                  |
| O00391       | Sulphydryl oxidase 1                         |
| A0A0C4DH38   | Immunoglobulin heavy variable 5-51           |
| P00488       | Coagulation factor XIII A chain              |
| P01721       | Immunoglobulin lambda variable 6-57          |
| P02746       | Complement C1q subcomponent subunit B        |
| P02763       | Alpha-1-acid glycoprotein 1                  |
| P01880       | Immunoglobulin heavy constant delta          |
| P63261       | Actin, cytoplasmic 2                         |
| P12259       | Coagulation factor V                         |
| P04180       | Phosphatidylcholine-sterol acyltransferase   |
| A0A075B6I0   | Immunoglobulin lambda variable 8-61          |
| P02774       | Vitamin D-binding protein                    |
| Q96KN2       | Beta-Ala-His dipeptidase                     |
| P43251       | Biotinidase                                  |
| P01877       | Immunoglobulin heavy constant alpha 2        |
| A0A075B6H9   | Immunoglobulin lambda variable 4-69          |
| A0A0C4DH34   | Immunoglobulin heavy variable 4-28           |
| P02747       | Complement C1q subcomponent subunit C        |
| A0M8Q6       | Immunoglobulin lambda constant 7             |
| P35542       | Serum amyloid A-4 protein                    |
| P02749       | Beta-2-glycoprotein 1                        |
| P80748       | Immunoglobulin lambda variable 3-21          |
| P01602       | Immunoglobulin kappa variable 1-5            |
| Code Uniprot | CG                                           |
| P02656       | Apolipoprotein C-III                         |
| Q06033       | Inter-alpha-trypsin inhibitor heavy chain H3 |
| P00918       | Carbonic anhydrase 2                         |
| P02675       | Fibrinogen beta chain                        |

|            |                                              |
|------------|----------------------------------------------|
| P01594     | Immunoglobulin kappa variable 1-33           |
| P01042     | Kininogen-1                                  |
| P05155     | Plasma protease C1 inhibitor                 |
| P01019     | Angiotensinogen                              |
| P19823     | Inter-alpha-trypsin inhibitor heavy chain H2 |
| P01859     | Immunoglobulin heavy constant gamma 2        |
| P01860     | Immunoglobulin heavy constant gamma 3        |
| P04264     | Keratin, type II cytoskeletal 1              |
| P02774     | Vitamin D-binding protein                    |
| P00450     | Ceruloplasmin                                |
| P80748     | Immunoglobulin lambda variable 3-21          |
| P01008     | Antithrombin-III                             |
| P02751     | Fibronectin                                  |
| P02647     | Apolipoprotein A-I                           |
| P06681     | Complement C2                                |
| P06310     | Immunoglobulin kappa variable 2-30           |
| P06276     | Cholinesterase                               |
| P32119     | Peroxiredoxin-2                              |
| A0A0B4J1V0 | Immunoglobulin heavy variable 3-15           |
| P02649     | Apolipoprotein E                             |
| Q96KN2     | Beta-Ala-His dipeptidase                     |
| P01876     | Immunoglobulin heavy constant alpha 1        |
| P02745     | Complement C1q subcomponent subunit A        |
| A0A0A0MS15 | Immunoglobulin heavy variable 3-49           |
| P01023     | Alpha-2-macroglobulin                        |
| P02671     | Fibrinogen alpha chain                       |
| A0A0B4J1U3 | Immunoglobulin lambda variable 1-36          |
| P07225     | Vitamin K-dependent protein S                |
| P63261     | Actin, cytoplasmic 2                         |
| P01871     | Immunoglobulin heavy constant mu             |
| P43652     | Afamin                                       |
| P05452     | Tetranectin                                  |
| P01780     | Immunoglobulin heavy variable 3-7            |
| P29622     | Kallistatin                                  |
| P51884     | Lumican                                      |
| P05543     | Thyroxine-binding globulin                   |
| P02766     | Transthyretin                                |
| Q15848     | Adiponectin                                  |
| A0A0C4DH31 | Immunoglobulin heavy variable 1-18           |
| P08603     | Complement factor H                          |
| P01011     | Alpha-1-antichymotrypsin                     |
| P00751     | Complement factor B                          |
| P0C0L4     | Complement C4-A                              |
| P04180     | Phosphatidylcholine-sterol acyltransferase   |
| P36955     | Pigment epithelium-derived factor            |
| P01602     | Immunoglobulin kappa variable 1-5            |

|            |                                              |
|------------|----------------------------------------------|
| A0A0B4J1U7 | Immunoglobulin heavy variable 6-1            |
| P43251     | Biotinidase                                  |
| O14791     | Apolipoprotein L1                            |
| P0C0L5     | Complement C4-B                              |
| P01877     | Immunoglobulin heavy constant alpha 2        |
| P06727     | Apolipoprotein A-IV                          |
| P02042     | Hemoglobin subunit delta                     |
| P02750     | Leucine-rich alpha-2-glycoprotein            |
| P01834     | Immunoglobulin kappa constant                |
| Q08380     | Galectin-3-binding protein                   |
| P02652     | Apolipoprotein A-II                          |
| P02765     | Alpha-2-HS-glycoprotein                      |
| Q9UK55     | Protein Z-dependent protease inhibitor       |
| P01024     | Complement C3                                |
| A0A0B4J1X5 | Immunoglobulin heavy variable 3-74           |
| P05090     | Apolipoprotein D                             |
| O95445     | Apolipoprotein M                             |
| P01615     | Immunoglobulin kappa variable 2D-28          |
| P13645     | Keratin, type I cytoskeletal 10              |
| P08185     | Corticosteroid-binding globulin              |
| P01701     | Immunoglobulin lambda variable 1-51          |
| P01857     | Immunoglobulin heavy constant gamma 1        |
| P27169     | Serum paraoxonase/arylesterase 1             |
| A0A0C4DH38 | Immunoglobulin heavy variable 5-51           |
| P05154     | Plasma serine protease inhibitor             |
| P04217     | Alpha-1B-glycoprotein                        |
| P04004     | Vitronectin                                  |
| B9A064     | Immunoglobulin lambda-like polypeptide 5     |
| P01611     | Immunoglobulin kappa variable 1D-12          |
| P19827     | Inter-alpha-trypsin inhibitor heavy chain H1 |
| P02747     | Complement C1q subcomponent subunit C        |
| P01619     | Immunoglobulin kappa variable 3-20           |
| P06312     | Immunoglobulin kappa variable 4-1            |
| P04211     | Immunoglobulin lambda variable 7-43          |
| P68871     | Hemoglobin subunit beta                      |
| P01706     | Immunoglobulin lambda variable 2-11          |
| P02743     | Serum amyloid P-component                    |
| P02790     | Hemopexin                                    |
| A0A0C4DH24 | Immunoglobulin kappa variable 6-21           |
| P01700     | Immunoglobulin lambda variable 1-47          |
| Q96PD5     | N-acetylmuramoyl-L-alanine amidase           |
| P00738     | Haptoglobin                                  |
| P01591     | Immunoglobulin J chain                       |
| P02654     | Apolipoprotein C-I                           |
| P01601     | Immunoglobulin kappa variable 1D-16          |
| P02655     | Apolipoprotein C-II                          |

|            |                                                                        |
|------------|------------------------------------------------------------------------|
| P06396     | Gelsolin                                                               |
| P25311     | Zinc-alpha-2-glycoprotein                                              |
| P02787     | Serotransferrin                                                        |
| P06702     | Protein S100-A9                                                        |
| P35858     | Insulin-like growth factor-binding protein complex acid labile subunit |
| P10909     | Clusterin                                                              |
| P01721     | Immunoglobulin lambda variable 6-57                                    |
| P08697     | Alpha-2-antiplasmin                                                    |
| P04433     | Immunoglobulin kappa variable 3-11                                     |
| P0DP03     | Immunoglobulin heavy variable 3-30-5                                   |
| P22792     | Carboxypeptidase N subunit 2                                           |
| P02768     | Albumin                                                                |
| Q03591     | Complement factor H-related protein 1                                  |
| A0A0B4J1V2 | Immunoglobulin heavy variable 2-26                                     |
| Q14624     | Inter-alpha-trypsin inhibitor heavy chain H4                           |
| A0A0C4DH68 | Immunoglobulin kappa variable 2-24                                     |
| A0A0B4J1Y9 | Immunoglobulin heavy variable 3-72                                     |
| P01009     | Alpha-1-antitrypsin                                                    |
| P02679     | Fibrinogen gamma chain                                                 |
| P02753     | Retinol-binding protein 4                                              |
| P02746     | Complement C1q subcomponent subunit B                                  |
| P02763     | Alpha-1-acid glycoprotein 1                                            |
| P05156     | Complement factor I                                                    |
| P01861     | Immunoglobulin heavy constant gamma 4                                  |
| P35542     | Serum amyloid A-4 protein                                              |
| P49908     | Selenoprotein P                                                        |
| P01624     | Immunoglobulin kappa variable 3-15                                     |
| P01031     | Complement C5                                                          |
| P04430     | Immunoglobulin kappa variable 1-16                                     |
| P02749     | Beta-2-glycoprotein 1                                                  |
| A0A075B6I0 | Immunoglobulin lambda variable 8-61                                    |
| Q96IY4     | Carboxypeptidase B2                                                    |
| P19652     | Alpha-1-acid glycoprotein 2                                            |
| P00915     | Carbonic anhydrase 1                                                   |
| P02760     | Protein AMBP                                                           |
| P69905     | Hemoglobin subunit alpha                                               |
| P05546     | Heparin cofactor 2                                                     |
| P04114     | Apolipoprotein B-100                                                   |
| P35527     | Keratin, type I cytoskeletal 9                                         |
| P00739     | Haptoglobin-related protein                                            |
| P00734     | Prothrombin                                                            |
| P04196     | Histidine-rich glycoprotein                                            |
| P01743     | Immunoglobulin heavy variable 1-46                                     |
| A0A0A0MT36 | Immunoglobulin kappa variable 6D-21                                    |
| A0A0J9YX35 | Immunoglobulin heavy variable 3-64D                                    |
| A0A0C4DH34 | Immunoglobulin heavy variable 4-28                                     |

|            |                                          |
|------------|------------------------------------------|
| P00488     | Coagulation factor XIII A chain          |
| A0A075B6J9 | Immunoglobulin lambda variable 2-18      |
| P18428     | Lipopolysaccharide-binding protein       |
| P04432     | Immunoglobulin kappa variable 1D-39      |
| A0A0C4DH25 | Immunoglobulin kappa variable 3D-20      |
| O00391     | Sulfhydryl oxidase 1                     |
| P01599     | Immunoglobulin kappa variable 1-17       |
| P13796     | Plastin-2                                |
| O43866     | CD5 antigen-like                         |
| P22352     | Glutathione peroxidase 3                 |
| O75882     | Attractin                                |
| P01714     | Immunoglobulin lambda variable 3-19      |
| P01709     | Immunoglobulin lambda variable 2-8       |
| P15814     | Immunoglobulin lambda-like polypeptide 1 |
| P01717     | Immunoglobulin lambda variable 3-25      |
| A0A0B4J1Y8 | Immunoglobulin lambda variable 9-49      |
| P00742     | Coagulation factor X                     |
| P55058     | Phospholipid transfer protein            |
| P05109     | Protein S100-A8                          |
| P04278     | Sex hormone-binding globulin             |
| P15169     | Carboxypeptidase N catalytic chain       |
| P11597     | Cholesteryl ester transfer protein       |
